# Supplementary material
Source: Royal Society of Chemistry journal article supplement (doi:10.1039/d6cp01684g)
Supplement: d6cp01684g1.pdf [file d6cp01684g1.pdf]

## Supplementary Information

### **Deciphering the Origin of the $^{13}\text{C}$ NMR Anomaly in Cyclic Ketones**

Binod Kumar Oram<sup>a,b</sup>, Saiprakash Rout<sup>a,b</sup>, Akshay Kumar Sahu<sup>a,b</sup>, and Himansu S. Biswal<sup>a,b\*</sup>

a. School of chemical sciences

National Institute of Science Education and Research (NISER)

PO- Bhipur-Padanpur, Via-Jatni, District- Khurda, PIN - 752050, Bhubaneswar, India

E-mail: himansu@niser.ac.in, Phone no. +91-674-2494 185/186

b. Homi Bhabha National Institute

Training School Complex, Anushakti Nagar, Mumbai 400094, India

## **Table of Contents**

| <b>Contents</b>                                          | <b>Page No.</b> |
|----------------------------------------------------------|-----------------|
| <b>1. Figures S1-S2</b>                                  | <b>S1</b>       |
| <b>2. Tables S1-S6</b>                                   | <b>S2</b>       |
| <b>3. Python Script for Overlap Integral Calculation</b> | <b>S8</b>       |

## 1. Supplementary Figures

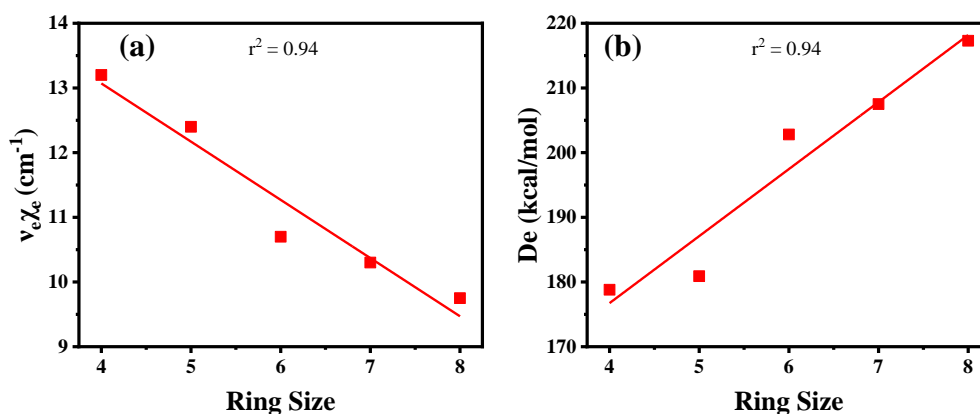

**Figure S1.** The correlation plot showing the variation of a) anharmonicity constant ( $\nu_e \chi_e$ ) observed for carbonyl stretching frequency mode, b) spectroscopic dissociation energy ( $D_e$ ) of C=O bond with change in ring size. The anharmonicity constant, dissociation energy shows a very good linear correlation.

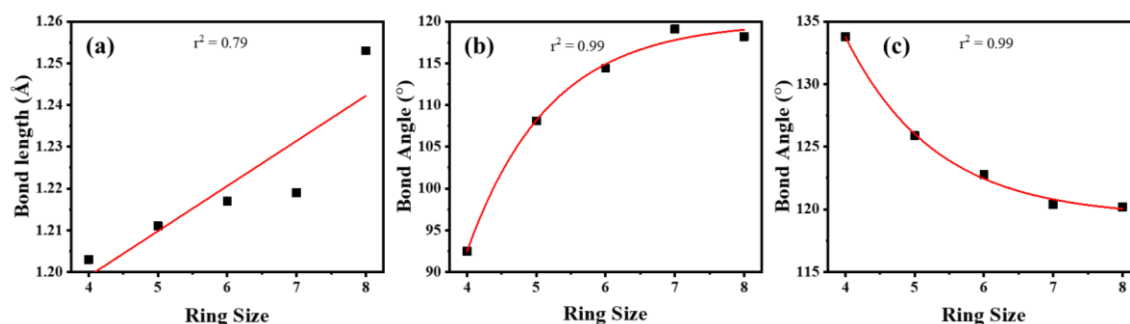

**Figure S2.** The correlation plot showing the variation of a) C=O Bond Length, b)  $\angle \text{CCC}$  angle, and c)  $\angle \text{CCO}$  angle with change in ring size. The C=O bond length shows a poor linear correlation with ring size, whereas the bond angles were found to show very good exponential correlation with ring size.

#### 4. Supplementary Tables

**Table S1.** Fundamental ( $\nu_{1\leftarrow 0}$ ), first ( $\nu_{2\leftarrow 0}$ ) and second overtone ( $\nu_{3\leftarrow 0}$ ), anharmonicity constant ( $\nu_e\chi_e$ ), dissociation energy ( $D_e$ ), and force constant (K) of the carbonyl bond of the cyclic ketones. Also, change in geometrical parameters of the cyclic ketones with change in ring size is given.

| Ketones     | $\nu_{1\leftarrow 0}$<br>( $\text{cm}^{-1}$ ) | $\nu_{2\leftarrow 0}$<br>( $\text{cm}^{-1}$ ) | $\nu_{3\leftarrow 0}$<br>( $\text{cm}^{-1}$ ) | $\nu_e\chi_e$<br>( $\text{cm}^{-1}$ ) | C=O<br>bond<br>length<br>( $\text{\AA}$ ) | <C-C-C<br>angle ( $^\circ$ ) | <C-C=O<br>angle ( $^\circ$ ) |
|-------------|-----------------------------------------------|-----------------------------------------------|-----------------------------------------------|---------------------------------------|-------------------------------------------|------------------------------|------------------------------|
| <b>4-CK</b> | 1788.5                                        | 3557.0                                        | 5286.5                                        | 13.2                                  | 1.203                                     | 92.5                         | 133.8                        |
| <b>5-CK</b> | 1748.9                                        | 3467.0                                        | 5172.1                                        | 11.9                                  | 1.211                                     | 108.1                        | 125.9                        |
| <b>6-CK</b> | 1717.1                                        | 3414.6                                        | 5087.4                                        | 10.7                                  | 1.217                                     | 114.4                        | 122.8                        |
| <b>7-CK</b> | 1704.6                                        | 3386.2                                        | 5052.3                                        | 10.3                                  | 1.219                                     | 119.1                        | 120.4                        |
| <b>8-CK</b> | 1702.2                                        | 3385.5                                        | 5048.1                                        | 9.8                                   | 1.253                                     | 118.2                        | 120.2                        |

**Table S2.** Principal components of the carbonyl  $^{13}\text{C}$  chemical shift tensor and the PAC on C and O atom.

| Ketones     | Calculated    |               |               |                  | PAC<br>on<br>'C' | PAC<br>on 'O' |
|-------------|---------------|---------------|---------------|------------------|------------------|---------------|
|             | $\delta_{11}$ | $\delta_{22}$ | $\delta_{33}$ | $\delta_{Total}$ |                  |               |
| <b>4-CK</b> | 282.8         | 246.3         | 94.8          | <b>208.0</b>     | 0.179            | -0.297        |
| <b>5-CK</b> | 278.6         | 246.5         | 125.1         | <b>216.7</b>     | 0.198            | -0.325        |
| <b>6-CK</b> | 281.5         | 261.4         | 82.7          | <b>208.5</b>     | 0.193            | -0.326        |
| <b>7-CK</b> | 284.6         | 256.4         | 93.0          | <b>211.3</b>     | 0.069            | -0.281        |
| <b>8-CK</b> | 284.8         | 266.6         | 89.8          | <b>213.7</b>     | 0.200            | -0.329        |

**Table S3.** Calculated principal components of the chemical shielding tensors and their corresponding diamagnetic and paramagnetic components of the five cyclic ketones.

|                             | <b>4-CK</b> | <b>5-CK</b> | <b>6-CK</b> | <b>7-CK</b> | <b>8-CK</b> |
|-----------------------------|-------------|-------------|-------------|-------------|-------------|
| $\sigma_{11}$               | -100.1      | -95.7       | -98.9       | -100.5      | -86.1       |
| $\sigma_{11}$ - <b>dia</b>  | 251.2       | 257.1       | 262.7       | 267.7       | 261.2       |
| $\sigma_{11}$ - <b>para</b> | -351.3      | -352.7      | -361.6      | -368.3      | -347.3      |
|                             |             |             |             |             |             |
| $\sigma_{22}$               | -60.1       | -64.0       | -67.8       | -58.3       | -52.1       |
| $\sigma_{22}$ - <b>dia</b>  | 267.4       | 265.1       | 269.9       | 250.1       | 251.0       |
| $\sigma_{22}$ - <b>para</b> | -327.5      | -329.2      | -337.7      | -308.4      | -303.0      |
|                             |             |             |             |             |             |
| $\sigma_{33}$               | 86.3        | 57.0        | 89.0        | 72.0        | 44.6        |
| $\sigma_{33}$ - <b>dia</b>  | 219.3       | 222.6       | 239.5       | 220.2       | 231.9       |
| $\sigma_{33}$ - <b>para</b> | -133.0      | -165.5      | -150.5      | -148.2      | -187.3      |
|                             |             |             |             |             |             |
| $\sigma_{iso}$              | -24.7       | -34.2       | -25.9       | -28.9       | -31.2       |

**Table S4.** The orbital contributions towards chemical shielding tensors of carbonyl carbon, obtained from NCS analysis for all the studied cyclic ketones.

|               |               |               |              |               |               |               |                                       |
|---------------|---------------|---------------|--------------|---------------|---------------|---------------|---------------------------------------|
| <b>4-CK</b>   | <b>O (LP)</b> | <b>O (LP)</b> | <b>C2-C3</b> | <b>C3-C4</b>  | <b>C3-O9</b>  | <b>C3-O9</b>  | <b><math>\Sigma\sigma_{ii}</math></b> |
| $\sigma_{11}$ | -41.1         | -2.7          | -37.6        | -37.6         | -160.7        | 11.5          | -268.2                                |
| $\sigma_{22}$ | 2.5           | -70.8         | -209.9       | -209.5        | 12.8          | 37.1          | -437.8                                |
| $\sigma_{33}$ | -8.6          | -4.4          | -32.3        | -33.3         | -50.2         | 6.9           | -121.9                                |
|               |               |               |              |               |               |               |                                       |
| <b>5-CK</b>   | <b>O (LP)</b> | <b>O (LP)</b> | <b>C2-C3</b> | <b>C3-C4</b>  | <b>C3-O9</b>  | <b>C3-O9</b>  |                                       |
| $\sigma_{11}$ | -40.4         | -2.8          | -33.8        | -33.8         | -162.6        | 7.2           | -266.2                                |
| $\sigma_{22}$ | 2.5           | -69.0         | -214.0       | -213.5        | 12.7          | 50.8          | -430.5                                |
| $\sigma_{33}$ | -7.1          | -7.1          | -49.1        | -49.0         | -33.9         | 6.9           | -139.3                                |
|               |               |               |              |               |               |               |                                       |
| <b>6-CK</b>   | <b>O (LP)</b> | <b>O (LP)</b> | <b>C1-C2</b> | <b>C1-C6</b>  | <b>C1-O7</b>  | <b>C1-O7</b>  |                                       |
| $\sigma_{11}$ | -40.4         | -1.3          | -31.3        | -31.2         | -157.5        | -5.0          | -266.7                                |
| $\sigma_{22}$ | 2.5           | -67.0         | -210.2       | -210.4        | 12.6          | 37.4          | -435.1                                |
| $\sigma_{33}$ | -3.9          | -4.0          | -45.3        | -45.1         | -25.4         | 7.0           | -116.7                                |
|               |               |               |              |               |               |               |                                       |
| <b>7-CK</b>   | <b>O (LP)</b> | <b>O (LP)</b> | <b>C4-C6</b> | <b>C6-C7</b>  | <b>C6-O18</b> | <b>C6-O18</b> |                                       |
| $\sigma_{11}$ | -36.6         | -7.2          | -102.0       | 13.9          | -141.8        | -13.4         | -287.1                                |
| $\sigma_{22}$ | -0.3          | -59.4         | -150.4       | -262.7        | 1.2           | 53.2          | -418.4                                |
| $\sigma_{33}$ | -5.9          | -1.6          | -54.5        | -49.4         | -3.1          | 7.1           | -107.4                                |
|               |               |               |              |               |               |               |                                       |
| <b>8-CK</b>   | <b>O (LP)</b> | <b>O (LP)</b> | <b>C1-C2</b> | <b>C1-C17</b> | <b>C1-O23</b> | <b>C1-O23</b> |                                       |
| $\sigma_{11}$ | -39.5         | -3.3          | -63.5        | -6.0          | -160.2        | -6.6          | -279.1                                |
| $\sigma_{22}$ | 1.9           | -62.9         | -195.5       | -251.7        | 9.7           | 46.9          | -451.6                                |
| $\sigma_{33}$ | -6.1          | -2.3          | -52.8        | -48.5         | -12.1         | 7.3           | -114.5                                |

**Table S5.** Root mean square deviation (RMSD) of the nuclear frameworks quantifying the structural relaxation upon the  $n \rightarrow \pi^*$  electronic transition.

|                   |             |             |             |             |             |
|-------------------|-------------|-------------|-------------|-------------|-------------|
| <b>Ketone</b>     | <b>4-CK</b> | <b>5-CK</b> | <b>6-CK</b> | <b>7-CK</b> | <b>8-CK</b> |
| <b>RMSD value</b> | 0.3434      | 0.2493      | 0.4627      | 0.4349      | 0.9991      |

**Table S6.** Cartesian coordinates (in Å), frequencies (in cm<sup>-1</sup>) and energetics (in Hartree) of the optimized geometries at B97D/aug-cc-pVTZ level of theory.

|                                                 | Co-ordinates |              |              | Frequencies  |        |        |        |
|-------------------------------------------------|--------------|--------------|--------------|--------------|--------|--------|--------|
| 4-CK<br>( <b>E<sub>HF</sub>: -231.1579515</b> ) | C            | -0.091645000 | -1.478115000 | 0.000000000  | 23.7   | 382.0  | 439.9  |
|                                                 | C            | -0.091645000 | -0.378529000 | 1.111968000  | 591.6  | 648.1  | 704.1  |
|                                                 | C            | 0.057483000  | 0.678448000  | 0.000000000  | 807.0  | 877.2  | 906.1  |
|                                                 | C            | -0.091645000 | -0.378529000 | -1.111968000 | 924.7  | 1031.9 | 1061.5 |
|                                                 | H            | -0.964465000 | -2.135289000 | 0.000000000  | 1142.6 | 1185.6 | 1189.4 |
|                                                 | H            | 0.815051000  | -2.088390000 | 0.000000000  | 1197.5 | 1230.1 | 1380.3 |
|                                                 | H            | 0.725755000  | -0.398667000 | 1.842057000  | 1398.2 | 1451.7 | 1793.0 |
|                                                 | H            | -1.039420000 | -0.278085000 | 1.655836000  | 2970.6 | 2975.7 | 3005.4 |
|                                                 | O            | 0.260182000  | 1.864691000  | 0.000000000  | 3028.4 | 3033.9 | 3066.7 |
|                                                 | H            | 0.725755000  | -0.398667000 | -1.842057000 |        |        |        |
| H                                               | -1.039420000 | -0.278085000 | -1.655836000 |              |        |        |        |
| 5-CK<br>( <b>E<sub>HF</sub>: -270.4847991</b> ) | C            | 1.379925130  | 0.737511110  | -0.236173350 | 95.9   | 225.8  | 431.0  |
|                                                 | C            | -0.030119000 | 1.237580840  | 0.121880160  | 454.8  | 545.1  | 565.3  |
|                                                 | C            | -0.931719520 | 0.000015090  | -0.000220850 | 675.3  | 777.4  | 811.1  |
|                                                 | C            | -0.030098930 | -1.237542260 | -0.122164380 | 856.9  | 889.3  | 925.9  |
|                                                 | C            | 1.379822280  | -0.737513650 | 0.236427540  | 928.1  | 985.2  | 1098.5 |
|                                                 | H            | 2.177759480  | 1.327914100  | 0.225210400  | 1126.6 | 1130.6 | 1184.4 |
|                                                 | H            | -0.411124380 | 2.060992360  | -0.490190150 | 1214.6 | 1256.1 | 1265.8 |
|                                                 | H            | -0.075007690 | 1.561646520  | 1.172494200  | 1299.0 | 1302.9 | 1403.7 |
|                                                 | O            | -2.143172800 | 0.000016200  | -0.000272490 | 1405.4 | 1453.2 | 1462.9 |
|                                                 | H            | -0.074595830 | -1.561426740 | -1.172854700 | 1749.4 | 2951.6 | 2952.2 |
|                                                 | H            | 2.177817590  | -1.327935620 | -0.224653430 | 2959.7 | 2965.4 | 3021.3 |
|                                                 | H            | 1.521118650  | -0.774165430 | 1.324629980  | 3027.1 | 3034.6 | 3035.9 |
|                                                 | H            | 1.521641650  | 0.774154470  | -1.324320870 |        |        |        |
| H                                               | -0.411320640 | -2.061051980 | 0.489634940  |              |        |        |        |
| 6-CK<br>( <b>E<sub>HF</sub>: -309.7895126</b> ) | C            | -1.160425000 | 0.000000000  | 0.077084000  | 87.5   | 174.7  | 294.0  |
|                                                 | C            | -0.390454000 | -1.282407000 | 0.375413000  | 397.7  | 407.4  | 462.4  |
|                                                 | C            | 1.006275000  | -1.265145000 | -0.290970000 | 485.2  | 639.5  | 723.4  |
|                                                 | C            | 1.790115000  | 0.000002000  | 0.088505000  | 736.3  | 807.1  | 846.5  |
|                                                 | C            | 1.006273000  | 1.265145000  | -0.290973000 | 860.0  | 883.3  | 961.0  |
|                                                 | C            | -0.390455000 | 1.282406000  | 0.375416000  | 990.3  | 1020.2 | 1027.7 |
|                                                 | O            | -2.288601000 | -0.000001000 | -0.380586000 | 1081.3 | 1102.3 | 1197.6 |

|                            |   |              |              |              |        |        |        |
|----------------------------|---|--------------|--------------|--------------|--------|--------|--------|
|                            | H | -0.987933000 | -2.141227000 | 0.054705000  | 1208.3 | 1229.3 | 1249.3 |
|                            | H | -0.254817000 | -1.339973000 | 1.466672000  | 1288.1 | 1298.7 | 1327.5 |
|                            | H | 1.560456000  | -2.166599000 | -0.002586000 | 1333.7 | 1338.6 | 1420.2 |
|                            | H | 0.880397000  | -1.298224000 | -1.382242000 | 1428.5 | 1445.3 | 1448.2 |
|                            | H | 2.768350000  | 0.000001000  | -0.408163000 | 1460.5 | 1721.8 | 2933.8 |
|                            | H | 1.976282000  | 0.000003000  | 1.172904000  | 2935.7 | 2940.7 | 2948.2 |
|                            | H | 1.560451000  | 2.166602000  | -0.002592000 | 2950.2 | 2995.0 | 2999.1 |
|                            | H | 0.880391000  | 1.298221000  | -1.382244000 | 3004.5 | 3032.9 | 3034.6 |
|                            | H | -0.987935000 | 2.141227000  | 0.054711000  |        |        |        |
|                            | H | -0.254812000 | 1.339969000  | 1.466673000  |        |        |        |
|                            | C | 0.548357000  | -1.629086000 | -0.142986000 | 46.2   | 165.1  | 219.8  |
|                            | C | 1.807109000  | -0.753946000 | -0.078682000 | 301.7  | 318.2  | 332.7  |
|                            | C | 1.629427000  | 0.708749000  | -0.518067000 | 446.5  | 477.1  | 498.5  |
|                            | C | -0.635615000 | -1.126100000 | 0.724491000  | 582.7  | 676.3  | 758.8  |
|                            | C | 0.723676000  | 1.537635000  | 0.415011000  | 797.5  | 819.7  | 832.2  |
|                            | C | -1.368411000 | 0.010782000  | 0.027230000  | 890.9  | 916.5  | 954.0  |
|                            | C | -0.778449000 | 1.418612000  | 0.112267000  | 974.1  | 1002.6 | 1018.7 |
|                            | H | 0.209400000  | -1.724933000 | -1.183706000 | 1063.7 | 1128.1 | 1134.6 |
|                            | H | 2.185569000  | -0.758664000 | 0.954676000  | 1167.9 | 1190.8 | 1227.4 |
| 7-CK                       | H | 1.230781000  | 0.744190000  | -1.543165000 | 1249.2 | 1264.2 | 1302.3 |
| ( $E_{HF}$ : -349.0856762) | H | 0.924624000  | 1.248675000  | 1.455969000  | 1324.1 | 1334.0 | 1342.8 |
|                            | H | -0.251570000 | -0.796694000 | 1.699945000  | 1344.4 | 1352.0 | 1402.7 |
|                            | H | 0.809078000  | -2.639273000 | 0.196059000  | 1437.7 | 1440.7 | 1446.3 |
|                            | H | 2.583005000  | -1.221213000 | -0.699593000 | 1455.8 | 1457.1 | 1707.9 |
|                            | H | 2.622363000  | 1.174713000  | -0.552788000 | 2930.3 | 2936.3 | 2940.5 |
|                            | H | -1.355282000 | -1.936477000 | 0.875100000  | 2948.0 | 2950.6 | 2955.8 |
|                            | H | 0.991265000  | 2.598186000  | 0.332790000  | 2984.4 | 2989.5 | 2994.1 |
|                            | O | -2.390881000 | -0.193391000 | -0.604040000 | 3001.2 | 3010.7 | 3036.2 |
|                            | H | -1.355637000 | 1.938060000  | 0.893120000  |        |        |        |
|                            | H | -1.023114000 | 1.920679000  | -0.831672000 |        |        |        |
|                            | C | -1.534410000 | -0.209692000 | 0.046832000  | 70.3   | 135.2  | 171.0  |
|                            | C | -0.769456000 | -1.331966000 | -0.647987000 | 206.8  | 270.7  | 306.0  |
| 8-CK                       | C | 0.904614000  | 1.355234000  | 0.642674000  | 343.4  | 410.9  | 443.9  |
| ( $E_{HF}$ : -388.3778352) | C | 0.551004000  | -1.726158000 | 0.077526000  | 490.4  | 508.1  | 628.8  |
|                            | C | 2.085147000  | 0.381988000  | 0.457566000  | 673.9  | 716.4  | 759.1  |
|                            | C | 1.796676000  | -0.912290000 | -0.329855000 | 794.7  | 838.9  | 866.4  |

|   |              |              |              |        |        |        |
|---|--------------|--------------|--------------|--------|--------|--------|
| H | -0.541868000 | -1.066762000 | -1.688337000 | 906.7  | 917.2  | 941.0  |
| H | 0.391501000  | -1.683405000 | 1.162847000  | 960.8  | 1012.9 | 1030.6 |
| H | 0.240446000  | 0.956498000  | 1.419908000  | 1064.5 | 1079.9 | 1085.3 |
| H | 2.461148000  | 0.113023000  | 1.454107000  | 1130.2 | 1171.5 | 1189.9 |
| H | -1.437382000 | -2.200451000 | -0.645715000 | 1218.0 | 1236.5 | 1246.4 |
| H | 1.297064000  | 2.295983000  | 1.046756000  | 1279.1 | 1302.0 | 1311.5 |
| H | 0.741042000  | -2.777635000 | -0.167038000 | 1319.2 | 1333.1 | 1348.4 |
| H | 2.906991000  | 0.903027000  | -0.053531000 | 1354.3 | 1365.7 | 1423.5 |
| H | 2.680065000  | -1.555070000 | -0.223242000 | 1441.3 | 1441.6 | 1449.3 |
| H | 1.724166000  | -0.685500000 | -1.402410000 | 1452.5 | 1480.0 | 1481.6 |
| C | -1.393293000 | 1.200653000  | -0.511611000 | 1706.8 | 2937.6 | 2942.2 |
| H | -1.936199000 | 1.877871000  | 0.156374000  | 2946.4 | 2958.3 | 2961.3 |
| H | -1.875844000 | 1.229618000  | -1.500385000 | 2961.5 | 2974.1 | 2978.9 |
| C | 0.085010000  | 1.630443000  | -0.646164000 | 2992.1 | 3002.7 | 3008.8 |
| H | 0.535161000  | 1.105927000  | -1.496599000 | 3013.4 | 3025.4 | 3030.4 |
| H | 0.108407000  | 2.696142000  | -0.899589000 |        |        |        |
| O | -2.205806000 | -0.442317000 | 1.037872000  |        |        |        |

## 5. Python script for overlap integral calculation

```
import numpy as np
import sys
import os
def read_cube(filename):
    """ Reads a Gaussian Cube file. """
    if not os.path.exists(filename):
        print(f"Error: '{filename}' not found.")
        sys.exit(1)
    with open(filename, 'r') as f:
        lines = f.readlines()
    try:
        natoms = int(lines[2].split()[0])
        origin = np.array([float(x) for x in lines[2].split()[1:4]])
        nx, dx, _, _ = [float(x) for x in lines[3].split()]
        ny, _, dy, _ = [float(x) for x in lines[4].split()]
        nz, _, _, dz = [float(x) for x in lines[5].split()]
        nx, ny, nz = int(nx), int(ny), int(nz)
    except:
        print("Error parsing header.")
        sys.exit(1)
    atoms = []
    header_end = 6 + natoms
    for i in range(6, header_end):
        parts = lines[i].split()
        # Store: (Atomic Number, Coords in Bohr)
        atoms.append((int(parts[0]), np.array([float(x) for x in parts[2:5]])))
    data_str = " ".join([l.strip() for l in lines[header_end:]])
    grid = np.fromstring(data_str, sep=' ').reshape((nx, ny, nz))
    return grid, {
        'dims':(nx,ny,nz),
        'steps':(dx,dy,dz),
        'origin':origin,
        'atoms':atoms,
        'dV':abs(dx*dy*dz)
    }
}
def calculate_rmsd(meta_homo, meta_lumo):
    """ Calculates atomic RMSD to quantify geometric similarity. """
    coords_h = np.array([a[1] for a in meta_homo['atoms']])
    coords_l = np.array([a[1] for a in meta_lumo['atoms']])
    if coords_h.shape != coords_l.shape:
        return None
    diff = coords_h - coords_l
    rmsd = np.sqrt(np.sum(diff**2) / len(coords_h))
    print("\n" + "="*50)
    print(f" GEOMETRIC ANALYSIS (Similarity Check)")
    print("="*50)
    print(f"Atomic RMSD Shift: {rmsd:.6f} Bohr")
    if rmsd < 0.02:
        print("Status: IDEAL")
    elif rmsd < 0.15:
        print("Status: MODERATE DISTORTION")
    else:
        print("Status: HIGH DISTORTION")
```

```

print("="*50)
return rmsd
def list_carbon_atoms(atoms):
    print("\n--- Candidate Carbon Atoms ---")
    valid = []
    for i, (z, coords) in enumerate(atoms):
        if z == 6:
            print(f"{i+1:3d} | C | {coords}")
            valid.append(i+1)
    return valid
def calculate_isotropic_detailed(grid_homo, grid_lumo, meta, center_idx):
    """ Calculates L and L/r^3 for X, Y, Z axes. """
    nx, ny, nz = meta['dims']
    dx, dy, dz = meta['steps']
    ox, oy, oz = meta['origin']
    # Center Coordinates
    atom_z, center_coords = meta['atoms'][center_idx - 1]
    print(f"\nCentering on Atom {center_idx} (Z={atom_z}) at {center_coords}")
    # Generate Relative Grids
    x_c = np.linspace(ox, ox + (nx-1)*dx, nx) - center_coords[0]
    y_c = np.linspace(oy, oy + (ny-1)*dy, ny) - center_coords[1]
    z_c = np.linspace(oz, oz + (nz-1)*dz, nz) - center_coords[2]
    X, Y, Z = np.meshgrid(x_c, y_c, z_c, indexing='ij')
    # Radial Terms
    R_sq = X**2 + Y**2 + Z**2 + 1e-6
    R_cubed = R_sq**1.5
    # Gradients of HOMO
    grad = np.gradient(grid_homo, dx, dy, dz)
    d_dx, d_dy, d_dz = grad[0], grad[1], grad[2]
    # Define Operators (L = -i * (r x grad))
    Lx_op = -1j * (Y * d_dz - Z * d_dy)
    Ly_op = -1j * (Z * d_dx - X * d_dz)
    Lz_op = -1j * (X * d_dy - Y * d_dx)
    operators = {'X': Lx_op, 'Y': Ly_op, 'Z': Lz_op}
    total_numerator = 0.0
    print("\n" + "="*85)
    print(f"{'Axis':^5} | {'Mixing <L>':^22} | {'Paramagnetic <L/r3>':^22} | {'Product (Real)':^18}")
    print("="*85)
    for axis, op in operators.items():
        integrand_L = grid_lumo * op
        val_L = np.sum(integrand_L) * meta['dV']
        integrand_Lr3 = integrand_L / R_cubed
        val_Lr3 = np.sum(integrand_Lr3) * meta['dV']
        # Physical contribution is the real part of the product
        product = (val_L * val_Lr3).real
        total_numerator += product
        print(f"{'axis':^5} | {'abs(val_L)':^22.4e} | {'abs(val_Lr3)':^22.4e} | {'product':^18.4e}")
    print("-" * 85)
    print(f"{'TOTAL':^5} | {'---':^22} | {'---':^22} | {'total_numerator':^18.4e}")
    print("="*85)
    return total_numerator
# --- MAIN ---
if __name__ == "__main__":
    print("-" * 60)
    print(" NMR PARAMAGNETIC NUMERATOR CALCULATOR (with RMSD)")

```

```

print("-" * 60)
f_homo = input("\nHOMO cube (Ground State Geometry: MOvalue-n.cub):\n>
").strip().replace("'",")
f_lumo = input("\nLUMO cube (Excited State Geometry: MOvalue-pi.cub):\n>
").strip().replace("'",")
g_homo, m_homo = read_cube(f_homo)
g_lumo, m_lumo = read_cube(f_lumo)
# 1. Quantify Structural Similarity
rmsd_val = calculate_rmsd(m_homo, m_lumo)
# 2. Fix Grid Mismatch (The Resizer Hack)
if g_homo.shape != g_lumo.shape:
    print(f"\n[!] Grid mismatch detected: HOMO {g_homo.shape} vs LUMO {g_lumo.shape}")
    min_shape = tuple(min(s1, s2) for s1, s2 in zip(g_homo.shape, g_lumo.shape))
    print(f" Resizing both grids to {min_shape} for compatibility...")
    g_homo = g_homo[:min_shape[0], :min_shape[1], :min_shape[2]]
    g_lumo = g_lumo[:min_shape[0], :min_shape[1], :min_shape[2]]
    m_homo['dims'] = min_shape # Ensure meshgrid aligns with resized data
# 3. Choose center and calculate
valid_list = list_carbon_atoms(m_homo['atoms'])
try:
    c_idx = int(input("\nSelect Carbon Atom Index for Centering: ").strip())
except ValueError:
    print("Invalid number.")
    sys.exit(1)
total_val = calculate_isotropic_detailed(g_homo, g_lumo, m_homo, c_idx)
print(f"\nFinal Isotropic Numerator Sum: {total_val:.6e}")
print("Note: If RMSD is high (> 0.1), use these results with caution.")
input("\nPress Enter to exit.")

```
